# Supplementary material
Source: publisher figshare collection journal article supplement (https://karger.figshare.com/ndownloader/files/8716141)
Supplement: Supplementary file 1 [file 8716141]

**Supplemental Table 1.** Temporal profile of imaging abnormalities on CT and FLAIR and T2*-weighted MRI

| Case | 1 | 2 | 3 | 4 | 5 | 6 |
| --- | --- | --- | --- | --- | --- | --- |
| cSAH on CT | * | ** | ** | X | * | ** |
| Time after the onset (day) image was taken | 23 | 14 | 9 | 2 | 3 | 35 |
| cSAH on FLAIR | ** | ** | ** | ** | * | X |
| Time after the onset (day) image was taken | 38 | 193 | 19 | 22 | 9 | 6 |
| cSAH on T2* | X | * | * | * | - | X |
| Time after the onset (day) image was taken | 38 | 155 | 128 | 7 | - | 6 |

Key: X, no resolution (defined as no change or persistence of imaging abnormalities, hyperdensity in the cortical sulci on CT, hyperintensity on FLAIR, and hypointensity on T2*-weighted MRI sequences); *, partial resolution (partial improvement of imaging abnormalities); **, full resolution (full resolution of imaging abnormalities); -, not examined

CT, computed tomography; FLAIR, fluid-attenuated inversion recovery; MRI, magnetic resonance imaging; cSAH, convexity subarachnoid hemorrhage
